# Supplementary material for: Photochemical conversion of CO2 to CO by a Re complex: theoretical insights into the formation of CO and HCO3− from an experimentally detected monoalkyl carbonate complex
Source: Royal Society of Chemistry journal article supplement (doi:10.1039/d1ra07286b), 2021-01-01
Supplement: d1ra07286b1.pdf [file d1ra07286b1.pdf]

We have presented the graphical abstract image and text for your article below. This briefly summarises your work, and will be presented with your article online.

PAPER

1

**Photochemical conversion of CO<sub>2</sub> to CO by a Re complex: theoretical insights into the formation of CO and HCO<sub>3</sub><sup>−</sup> from an experimentally detected monoalkyl carbonate complex**

Miho Isegawa\* and Akhilesh K. Sharma

Triethanolamine (TEOA) has been used for the photocatalytic reduction of CO<sub>2</sub>, and the experimental studies have demonstrated that the TEOA increases the catalytic efficiency.

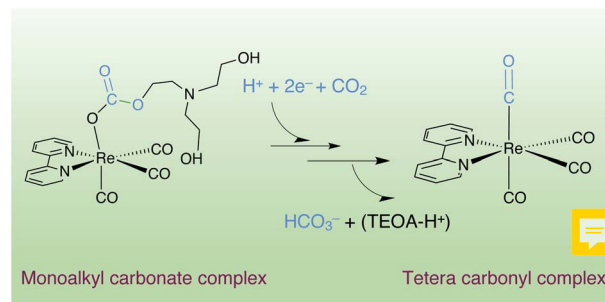

Please check this proof carefully. Our staff will not read it in detail after you have returned it.

Please send your corrections either as a copy of the proof PDF with electronic notes attached or as a list of corrections. **Do not edit the text within the PDF or send a revised manuscript** as we will not be able to apply your corrections. Corrections at this stage should be minor and not involve extensive changes.

**Proof corrections must be returned as a single set of corrections, approved by all co-authors. No further corrections can be made after you have submitted your proof corrections as we will publish your article online as soon as possible after they are received.**

Please ensure that:

- The spelling and format of all author names and affiliations are checked carefully. You can check how we have identified the authors' first and last names in the researcher information table on the next page. **Names will be indexed and cited as shown on the proof, so these must be correct.**
- Any funding bodies have been acknowledged appropriately and included both in the paper and in the funder information table on the next page.
- All of the editor's queries are answered.
- Any necessary attachments, such as updated images or ESI files, are provided.

Translation errors can occur during conversion to typesetting systems so you need to read the whole proof. In particular please check tables, equations, numerical data, figures and graphics, and references carefully.

Please return your **final** corrections, where possible within **48 hours** of receipt following the instructions in the proof notification email. If you require more time, please notify us by email to [advances@rsc.org](mailto:advances@rsc.org).

## Funding information

Providing accurate funding information will enable us to help you comply with your funders' reporting mandates. Clear acknowledgement of funder support is an important consideration in funding evaluation and can increase your chances of securing funding in the future.

We work closely with Crossref to make your research discoverable through the Funding Data search tool (<http://search.crossref.org/funding>). Funding Data provides a reliable way to track the impact of the work that funders support. Accurate funder information will also help us (i) identify articles that are mandated to be deposited in **PubMed Central (PMC)** and deposit these on your behalf, and (ii) identify articles funded as part of the **CHORUS** initiative.

Further information can be found on our webpage (<http://rsc.li/funding-info>).

### What we do with funding information

We have combined the information you gave us on submission with the information in your acknowledgements. This will help ensure the funding information is as complete as possible and matches funders listed in the Crossref Funder Registry.

If a funding organisation you included in your acknowledgements or on submission of your article is not currently listed in the registry it will not appear in the table on this page. We can only deposit data if funders are already listed in the Crossref Funder Registry, but we will pass all funding information on to Crossref so that additional funders can be included in future.

## Please check your funding information

The table below contains the information we will share with Crossref so that your article can be found *via* the Funding Data search tool. **Please check that the funder names and grant numbers in the table are correct and indicate if any changes are necessary to the Acknowledgements text.**

| Funder name                                | Funder's main country of origin | Funder ID (for RSC use only) | Award/grant number |
|--------------------------------------------|---------------------------------|------------------------------|--------------------|
| Japan Society for the Promotion of Science | Japan                           | 501100001691                 | JP18K05297         |

## Researcher information

Please check that the researcher information in the table below is correct, including the spelling and formatting of all author names, and that the authors' first, middle and last names have been correctly identified. **Names will be indexed and cited as shown on the proof, so these must be correct.**

If any authors have ORCID or ResearcherID details that are not listed below, please provide these with your proof corrections. Please ensure that the ORCID and ResearcherID details listed below have been assigned to the correct author. Authors should have their own unique ORCID iD and should not use another researcher's, as errors will delay publication.

Please also update your account on our online [manuscript submission system](#) to add your ORCID details, which will then be automatically included in all future submissions. See [here](#) for step-by-step instructions and more information on author identifiers.

| First (given) and middle name(s) | Last (family) name(s) | ResearcherID | ORCID iD            |
|----------------------------------|-----------------------|--------------|---------------------|
| Miho                             | Isegawa               | G-3429-2016  | 0000-0002-2237-2695 |
| Akhilesh K.                      | Sharma                | B-5206-2019  | 0000-0003-2488-0754 |

## Queries for the attention of the authors

Journal: **RSC Advances**

Paper: **d1ra07286b**

Title: **Photochemical conversion of CO<sub>2</sub> to CO by a Re complex: theoretical insights into the formation of CO and HCO<sub>3</sub><sup>−</sup> from an experimentally detected monoalkyl carbonate complex**

For your information: You can cite this article before you receive notification of the page numbers by using the following format: (authors), RSC Adv., (year), DOI: 10.1039/d1ra07286b.

Editor's queries are marked on your proof like this **1**, **2**, etc. and for your convenience line numbers are indicated like this 5, 10, 15, ...

Please ensure that all queries are answered when returning your proof corrections so that publication of your article is not delayed.

| Query Reference | Query                                                                                                                                                                                                                                                                                                                                       | Remarks |
|-----------------|---------------------------------------------------------------------------------------------------------------------------------------------------------------------------------------------------------------------------------------------------------------------------------------------------------------------------------------------|---------|
| 1               | <p>Have all of the author names been spelled and formatted correctly? Names will be indexed and cited as shown on the proof, so these must be correct. No late corrections can be made.</p> <div> <p>Please tick this box or indicate your confirmation if you have no corrections to make to the proof</p> <input type="checkbox"/> </div> |         |
| 2               | <p>Do you wish to add an e-mail address for the corresponding author? If so, please provide the relevant information.</p>                                                                                                                                                                                                                   |         |
| 3               | <p>Is the inserted Graphical Abstract text suitable? If you provide replacement text, please ensure that it is no longer than 250 characters (including spaces).</p> <div> <p>Please tick this box or indicate your confirmation if you have no corrections to make to the proof</p> <input type="checkbox"/> </div>                        |         |
| 4               | <p>As the equations appeared to be labelled out of numerical order, the equations have been renumbered. Please check that the renumbering is correct and that all of the citations within the text correspond to the correct equation, and indicate any changes required.</p>                                                               |         |
| 5               | <p>Fig. 8 contains parts labelled (a) and (b), but these do not appear to be mentioned in the caption. Would you like to modify the caption or resupply the artwork (preferably as a TIF file at 600 dots per inch)?</p>                                                                                                                    |         |
| 6               | <p>Have all of the funders of your work been fully and accurately acknowledged?</p> <div> <p>Please tick this box or indicate your confirmation if you have no corrections to make to the proof</p> <input type="checkbox"/> </div>                                                                                                         |         |
| 7               | <p>Ref. 2: Please provide the page (or article) number(s).</p>                                                                                                                                                                                                                                                                              |         |

|   |                                                                    |  |
|---|--------------------------------------------------------------------|--|
| 8 | Ref. 47: Please provide the journal title and year of publication. |  |
| 9 | Ref. 56: Please provide the page (or article) number(s).           |  |

# Photochemical conversion of CO<sub>2</sub> to CO by a Re complex: theoretical insights into the formation of CO and HCO<sub>3</sub><sup>−</sup> from an experimentally detected monoalkyl carbonate complex†

Miho Isegawa <sup>\*a</sup> and Akhilesh K. Sharma <sup>b</sup>

Cite this: DOI: 10.1039/d1ra07286b

Received 30th September 2021  
Accepted 17th November 2021

DOI: 10.1039/d1ra07286b  
rsc.li/rsc-advances

Triethanolamine (TEOA) has been used for the photocatalytic reduction of CO<sub>2</sub>, and the experimental studies have demonstrated that the TEOA increases the catalytic efficiency. In addition, the formation of a carbonate complex has been confirmed in the Re photocatalytic system where DMF and TEOA are used as solvents. In this study, we survey the reaction pathways of the photocatalytic conversions of CO<sub>2</sub> to CO + H<sub>2</sub>O and CO<sub>2</sub> to CO + HCO<sub>3</sub><sup>−</sup> by *fac*-Re(bpy)(CO)<sub>3</sub>Br in the presence of TEOA using density functional theory (DFT) and domain-based local pair natural orbital coupled cluster approach, DLPNO-CCSD(T). Under light irradiation, the solvent-coordinated Re complex is first reduced to form a monoalkyl carbonate complex in the doublet pathway. This doublet pathway is kinetically advantageous over the singlet pathway. To reduce carbon dioxide, the Re complex needs to be reduced by two electrons. The second electron reduction occurs after the monoalkyl carbonate complex is protonated. The second reduction involves the dissociation of the monoalkyl carbonate ligand, and the dissociated ligand recombines the Re center *via* carbon to generate Re–COOH species, which further reacts with CO<sub>2</sub> to generate tetracarbonyl complex and HCO<sub>3</sub><sup>−</sup>. The two-electron reduced ligand-free Re complex converts CO<sub>2</sub> to CO and H<sub>2</sub>O. The pathways leading to H<sub>2</sub>O formation have lower barriers than the pathways leading to HCO<sub>3</sub><sup>−</sup> formation, but their portion of formation must depend on proton concentration.

## 1. Introduction

With the advancement of science and technology, fossil fuels have been consumed in large quantities, and the demand is still increasing. Consequently, the increase of the atmospheric CO<sub>2</sub> concentration has become a severe environmental problem. Atmospheric CO<sub>2</sub> accumulation is considered as a major cause of climate change and ultimately endangers the Earth's ecosystems.<sup>1,2</sup>

CO<sub>2</sub> is a moderately stable gas with very low reactivity, since it is the most oxidized form of carbon.<sup>3,4</sup> Thus, the conversion of CO<sub>2</sub> to value-added chemicals is highly challenging. Although many catalysts have been developed, they do not satisfy the criteria for industrial application. Furthermore, for practical use, the development of catalysts using earth-abundant transition metals is desirable, but their activity is typically low. Hence, catalyst design research has mainly been conducted using

mainly precious metals.<sup>5,6</sup> Therefore, it is crucial to clarify the reaction mechanisms of precious metal catalysts, for which many experimental studies have been conducted.<sup>6–8</sup>

d<sup>6</sup> transition metals, such as Re(I) and Ru(II), have been used with a redox-active diamine ligands have been used as photosensitizers due to their ability to form long-lived triplet excited states under the photoirradiation and their strong oxidizing power. In addition, various substituents on bpy can be used to adjust the redox properties of the metal complex.

Re(I) and Ru(II) diimine complexes have been also used as catalysts for CO<sub>2</sub> reduction. The bulky bpy ligand derivatives prevent dimerization of the metal complex, which reduces catalytic activity.<sup>9</sup> Also, the positions of the substituents on bpy affect the catalytic activity.<sup>10</sup> Thus, the bpy ligand based metal complexes are highly flexible, and bpy affects catalysis of the metal complex catalysis.

A representative homogeneous photocatalysts for CO<sub>2</sub> reduction is *fac*-[Re<sup>I</sup>(bpy)(CO)<sub>3</sub>X] (bpy = 2,2'-bipyridine, X = Cl<sup>−</sup> or Br<sup>−</sup>). Photocatalytic CO<sub>2</sub> reduction by this Re complex in a dimethylformamide (DMF)/triethanolamine (TEOA) mixed solvent was first reported by Lehn and co-workers.<sup>11</sup> In this catalyst system, the Re complex acts as both a photosensitizer and a catalyst, and TEOA functions as a sacrificial reductant.

<sup>a</sup>International Institute for Carbon-Neutral Energy Research (WPI-I2CNER), Kyushu University, 744 Moto-oka, Nishi-ku, Fukuoka, 819-0395, Japan

<sup>b</sup>International Research Center for Elements Science (IRCCELS), Institute for Chemical Research (ICR), Kyoto University, Uji, Kyoto 611-0011, Japan

† Electronic supplementary information (ESI) available. See DOI: 10.1039/d1ra07286b

The main reduction product is CO with the generation of Re-formate complexes in non-catalytic amounts. Neither  $\text{CO}_3^{2-}$  nor  $\text{HCO}_3^-$  was detected in nuclear magnetic resonance (NMR) spectra.<sup>11</sup> In contrast, prior to this photocatalytic study, Mayer *et al.*<sup>12</sup> investigated the electrochemical reduction of  $\text{CO}_2$  by Re complexes in an acetonitrile solution, and they reported that CO and  $\text{CO}_3^{2-}$  were detected as major products. It has also been reported that RuRe photocatalytic  $\text{CO}_2$  reduction yields both CO and  $\text{HCO}_3^-$  as products using 1,3-dimethyl-2-phenyl-2,3-dihydro-1H-benzo[d]imidazole as a sacrificial electron donor (BIH), where the BIH donates two electrons to one of  $\text{CO}_2$  molecules and another  $\text{CO}_2$  molecule receives oxygen.<sup>13</sup>

Recently, Ishitani and co-workers re-examined photocatalytic  $\text{CO}_2$  reduction by the *fac*-[Re(bpy)(CO)<sub>3</sub>Br] catalyst.<sup>14,15</sup> Their main objective was to identify the contribution of triethanolamine (TEOA) to the photocatalytic process. In the study, a mixture of *N,N*-dimethylformamide (DMF) with a large portion of TEOA (DMF : TEOA-of 5 : 1 v/v) was used as a solvent. They showed that  $\text{CO}_2$  is efficiently captured even at a low concentration in the presence of TEOA, and they detected a monoalkyl carbonate complex, *fac*-[Re(bpy)(CO)<sub>3</sub>(R<sub>2</sub>N-CH<sub>2</sub>CH<sub>2</sub>O-COO)] (**17c**<sup>0</sup>, Fig. 1). The monoalkyl carbonate complex is also formed in the RuRe bimetallic system<sup>16</sup> in which Ru and Re units serve as a photosensitizer and a catalyst, respectively. Based on the linear relationship between the initial rate of CO formation and the concentration of the monoalkyl carbonate complex in the RuRe system, it was suggested that the monoalkyl carbonate complex is the active species of in CO formation.<sup>8,17</sup>

The proposed catalytic cycle for the Re catalyst is illustrated in Fig. 1.<sup>8,18</sup> According to the proposed catalytic cycle, complex **1** is reduced by TEOA with the photoirradiation, and the one-electron reduced complex (**21**<sup>-</sup>) is used to reduce complex **17c**<sup>0</sup>. The formation of complexes **16**<sup>0</sup> and **17c**<sup>0</sup> has been experimentally confirmed. However, the formation mechanism of the formation of complex **17c**<sup>0</sup> and the subsequent reaction process for the conversion of  $\text{CO}_2$  to CO have yet to be elucidated.

Muckerman and co-workers<sup>19</sup> performed a competitive carbon kinetic isotope effect study and density functional

theory (DFT) calculations to examine the mechanism of  $\text{CO}_2$  reduction in a DMF/TEOA mixed solvent. They examined several possible routes and concluded that the  $\text{CO}_2$  reduction route cannot be uniquely determined. The proposed mechanism partially resembles the computationally identified electrochemical process:<sup>20</sup>  $\text{CO}_2$  binds to the Re center in the  $\eta^1$  mode, and is protonated by an acid to form a tetracarbonyl complex and water. However, TEOA acts only as a sacrificial reductant and a proton donor in their suggested mechanism; the effect of the experimentally trapped monoalkyl carbonate complex on the catalytic efficiency remains to be elucidated.

In this study, we aim at elucidating the mechanism of photocatalytic  $\text{CO}_2$  reduction to CO by the Re complex in the presence of TEOA using DFT and recently developed domain-based local pair natural orbital coupled cluster approach, DLPNO-CCSD(T).<sup>21,22</sup> We focus on the formation of the experimentally trapped monoalkyl carbonated complex and its contribution to the catalytic process. To examine the catalytic process, including the electron reduction process, we computed the thermodynamic and kinetic data, along with the reduction potentials for the key intermediates, of the catalytic process.

## 2. Method

All computations in this study were performed using Gaussian 09 program<sup>23</sup> and ORCA program.<sup>24</sup> All structures were fully optimized without any constraints using the M06-L functional.<sup>25</sup> M06-L has been used to investigate the mechanism of  $\text{CO}_2$  reduction by Re-complex.<sup>19,26</sup>

The Stuttgart/Dresden (SDD) basis set<sup>27</sup> and its associated effective core potential were used for Re and Br, and 6-311G(d,p) basis sets<sup>28</sup> were used for the remaining atoms. The SMD implicit solvation model<sup>29</sup> was used to incorporate the solvation effect of the DMF solvent ( $\epsilon = 37.219$ ). Integrals were evaluated using a pruned grid that consisted of 99 radial shells with 590 angular points per shell. The wave function stability was evaluated for all metal complexes.

Vibrational frequency calculations were performed at the same theoretical level of to verify the minima and TSs, and to obtain zero-point vibrational energy (ZPE) corrections. The thermal corrections were computed at 298.15 K and 1 atm. The connectivity of the stationary points was verified *via* the 'pseudo' intrinsic reaction coordinate (IRC) approach,<sup>30</sup> where IRC calculations were performed for 20 steps from the TS (in both the forward and reverse directions), and subsequent structures were fully optimized to identify the minima.

The electron energies of all complexes were calculated using DLPNO-CCSD (T) with the def2-TZVP basis set. To accelerate the calculation of two electron integrals, resolution of identity (RI) approximation was applied for the Coulomb integrals and chain-of-spheres (COS) algorithm was applied for the exact exchange terms by employing Coulomb fitting auxiliary basis set<sup>31</sup> and correlation-fitting auxiliary basis set.<sup>32</sup> The solvation effects was considered using SMD implicit solvation model. In the Gibbs free energy calculation, the electronic energy was estimated by LPNO-CCSD(T), while the thermal correction was estimated by M06-L functional.

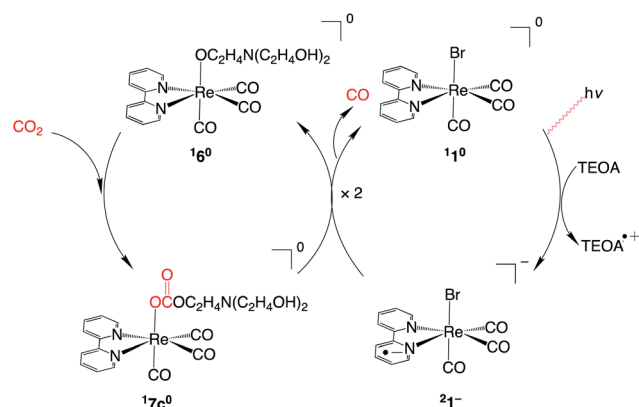

Fig. 1 Proposed mechanism for photocatalytic  $\text{CO}_2$  reduction by the Re catalyst in a DMF/TEOA mixed solvent in ref. 8.

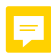

In terms of the accuracy of LPNO-CCSD(T) method, the recent assessment study showed that the deviation from CCSD(T) method is within 1.0 kcal mol<sup>-1</sup> for the energy barrier of hydrogen atom transfer.<sup>33</sup> The DLPNO-CCSD(T) has been also examined for the low- and high-spin splitting energy for spin crossover model complexes, and shown to be reasonably agree to multireference perturbation theory (CASPT2).<sup>34</sup> The DLPNO-CCSD(T) method has been applied to obtain accurate energy profile for the CO<sub>2</sub> hydrogenation by Ru and Co complexes.<sup>35</sup>

Artificial force induced reaction (AFIR)<sup>36</sup> calculations were performed using an artificial force parameter of 47.8 kcal mol<sup>-1</sup> to obtain “approximate” reaction paths and TSs.

The reduction potential of the complex in a DMF solution for a saturated calomel electrode (SCE) was calculated using the following equation:<sup>37</sup>

$$E^\circ = -E_{\text{SHE}}^\circ - E^\circ(\text{SCE/SHE}) + E_j^\circ(\text{Ox}) - \Delta G_{\text{R/O}}^\circ / nF \quad (1)$$

where  $E_{\text{SHE}}^\circ$  (4.28 V)<sup>38,39</sup> is the absolute potential of the standard hydrogen electrode (SHE),  $E^\circ(\text{SCE/SHE})$  (0.241 V (ref. 40)) is potential of aqueous SCE relative to SHE,  $E_j^\circ$  (0.172 V)<sup>41</sup> is the correction for a liquid junction potential.  $\Delta G_{\text{R/O}}^\circ$  is the difference in Gibbs free energy between the reductant and the oxidant in the DMF solution for the reaction, which is expressed as

$$\Delta G_{\text{R/O}}^\circ = G_{\text{solv}}^\circ(\text{Red}) - G_{\text{solv}}^\circ(\text{Ox}), \quad (2)$$

$n$  is the number of electrons that are involved in the reaction, and  $F$  is the Faraday constant. When the energy is expressed in eV, the  $F$  is equal to the unit charge  $e$ . The superscript circle denotes a standard definition of a standard state of 1 atom of an ideal gas for gases and a standard state of a 1 molal ideal solution for the solute.

To calculate the difference in the Gibbs free energy in solution, a thermodynamic cycle is typically used.<sup>42</sup> However, in a previous computational study by Ho,<sup>43</sup> redox potentials that were computed based on the direct approach in eqn (2) yielded a similar result to those that were calculated using the thermodynamic cycle in the SMD solvation model.<sup>29</sup> Therefore, we used the direct approach to estimate  $\Delta G_{\text{R/O}}^\circ$  (eqn (2)).

To clearly describe the reaction processes, labels are assigned to all intermediates, with superscripts on the left and right representing the spin multiplicity and the charge, respectively, of the complex.

### 3. Results and discussion

#### 3.1 Reduction of CO<sub>2</sub> to CO

Carbon monoxide has been reported as a product (eqn (3)) of both photochemical and electrochemical CO<sub>2</sub> reduction by mononuclear Re and dinuclear RuRe complexes.<sup>11,13,14</sup> In the electrochemical reduction of CO<sub>2</sub> by the Re monomer complex, the HCO<sub>3</sub><sup>-</sup> formation with CO has been reported.<sup>12</sup> In addition, the formation of HCO<sub>3</sub><sup>-</sup> in photocatalytic CO<sub>2</sub> reduction has been reported when the dinuclear RuRe complex is used as a catalyst.<sup>13</sup> Hence, the reaction pathway for the formation of HCO<sub>3</sub><sup>-</sup> that is expressed in eqn (4) is also explored.

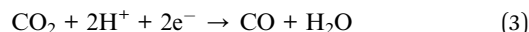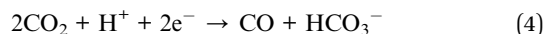

In both reactions, two-electrons contribute to the catalytic reaction. In the reaction (4), the product will be either CO<sub>3</sub><sup>2-</sup>, HCO<sub>3</sub><sup>-</sup>, or H<sub>2</sub>CO<sub>3</sub>, depending on the type of proton donor.

The Re-catalyzed CO<sub>2</sub> reduction reaction in the presence of TEOA includes the formation of metal monoalkyl carbonate complexes, the reduction of metal complexes, and the reduction of CO<sub>2</sub>, which leads to the production of CO, H<sub>2</sub>O, HCO<sub>3</sub><sup>-</sup>, and a formate complex. All of these processes are systematically discussed in the following sections. The recent experimental study detects the Re-dimer,<sup>44</sup> but the experimental studies targeted in this study<sup>14,15</sup> did not report the dimer detection, implying the dimerization depends on the experimental condition. In this study, we only focus on the catalytic process by Re-monomer.

**One electron reduction of the Re-Br complex.** The mechanism for the one electron reduction of the Re complex (**1**<sup>0</sup>) and the formation of protonated TEOA (TEOAH<sup>+</sup>) has been well established experimentally (Fig. 2),<sup>45,46</sup> and it is briefly reviewed here.

The reaction is initiated by photoexcitation of a singlet Re complex, [Re(bpy)(CO)<sub>3</sub>Br]<sup>0</sup> (Fig. 2). The generated singlet excited state decays to a long-lived lowest triplet state, [Re(bpy)(CO)<sub>3</sub>Br]<sup>0\*</sup>, which is characterized as a metal-to-ligand charge-transfer state (<sup>3</sup>MLCT).<sup>47–49</sup> A previous experimental and time-dependent density functional theory study showed that the long-lived phosphorescence originates from the lowest triplet state.<sup>46</sup> Then, the lowest triplet state [Re(bpy)(CO)<sub>3</sub>Br]<sup>0\*</sup> ( $E^\circ = 0.74$  V vs. SCE, Fig. 3) is reductively quenched by TEOA ( $E^\circ(\text{TEOA}^+/\text{TEOA}) = 0.72$  V, Fig. 3), thereby resulting in the formation of a one-electron-reduced complex (*fac*-[Re(bpy)(CO)<sub>3</sub>Br]<sup>-</sup>) and TEOA radical cation (TEOA<sup>+</sup>):

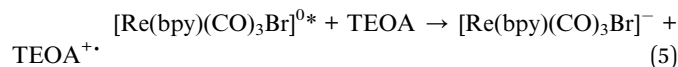

This electron transfer reaction is exergonic by only 0.6 kcal mol<sup>-1</sup>. In the lowest triplet state, the spin density is equally distributed on the Re-Br unit and the bpy ligand, where the Re spin density is 0.53. In contrast, in the one-electron

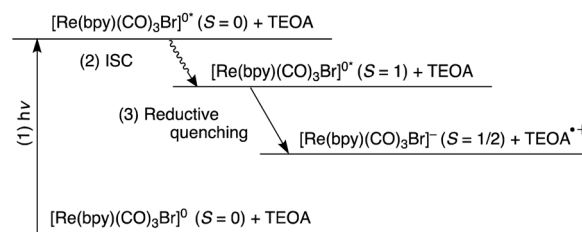

Fig. 2 Schematic diagram of the formation of a one-electron-reduced Re complex starting from the ground state of [Re(bpy)(CO)<sub>3</sub>Br]<sup>0</sup> via (1) photo absorption, (2) intersystem crossing (ISC), and (3) reductive quenching.



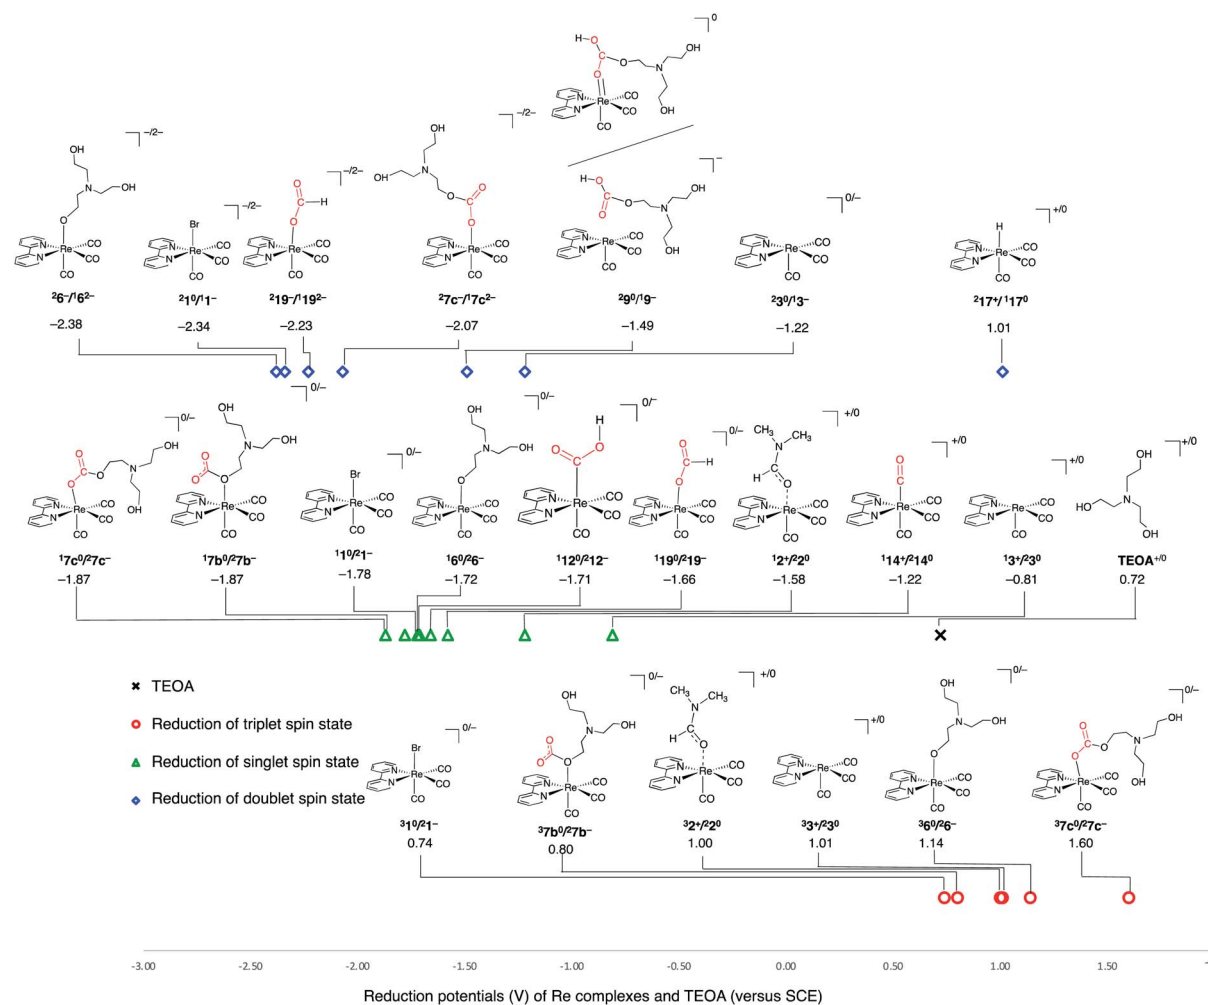

**Fig. 3** One-electron reduction potentials (V vs. SCE) that were calculated for the triplet, singlet, and doublet spin states of the Re complexes. The level,  $^31^0/2^1-$ , indicates that species 1 with zero charge in the triplet spin state is reduced to species 2 with minus one charge in the doublet spin state. The higher the positive value, the stronger the oxidizing power.

reduced doublet complex, the spin density is exclusively located in the bpy ligand and no spin density on Re (Fig. 4). Then, the oxidized TEOA ( $\text{TEOA}^{++}$ ) is then deprotonated by neutral TEOA:

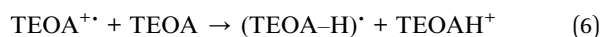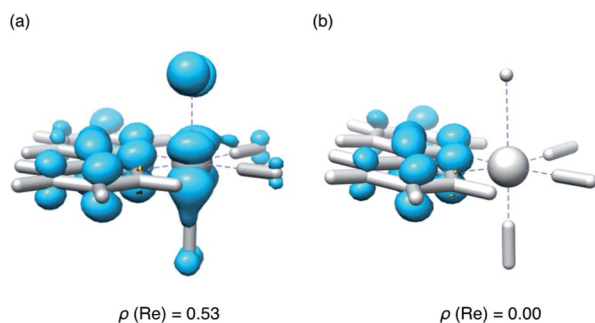

**Fig. 4** Distribution of Mulliken spin densities in (a) the triplet spin state and (b) the one-electron-reduced doublet spin state.

and the reaction is exergonic by  $6.5 \text{ kcal mol}^{-1}$ . For species ( $\text{TEOA-H}$ ), the location where the hydrogen atom is extracted is illustrated in Fig. S1 of the ESI.† The generated protonated  $\text{TEOA}^+$  acts as a proton donor.

The redox potential is essential to discuss the electron transfer process. However, the redox potentials calculated using the DFT or wavefunction method in combination with the negative solvation model often do not match the experimental values due to solvation energy errors.<sup>50</sup> The Re complex, which is the subject of this study, also showed a substantial deviation from the experimental value. The redox potential of  $\text{fac}[\text{Re}^{\text{I}}(\text{bpy})(\text{CO})_3\text{Cl}]$  calculated at the DLPNO-CCSD(T) level in conjunction of implicit solvation model was  $-1.76 \text{ V}$  against the experimental value,  $-1.34 \text{ V}$ .<sup>51</sup> The discussion of electron transfer in this study is based on the assumption that the errors are systematic among the Re complexes.

**Formation of monoalkyl carbonate derivative (6c);  $\text{fac}[\text{Re}(\text{bpy})(\text{CO})_3(\text{R}_2\text{N-CH}_2\text{CH}_2\text{O-COO})]$ .** Since the formation of  $\text{fac}[\text{Re}(\text{bpy})(\text{CO})_3(\text{R}_2\text{N-CH}_2\text{CH}_2\text{O-COO})]$  has been demonstrated to occur without light irradiation, we explore the



reaction pathway of its formation from a solvent-coordinated complex, namely, *fac*-[Re(bpy)(CO)<sub>3</sub>(DMF)]<sup>+</sup>, under dark conditions using DFT methods (Fig. 5). For the conformation of TEOA, we consistently use the “open form” without intra-molecular hydrogen bonding under the assumption that the hydrogen bonding occurs with another TEOA or DMF in the mixed solvent.

The reaction is initiated by the dissociation of DMF from the Re center of complex <sup>1</sup>2<sup>+</sup> and it significantly destabilized the Re complex. As an intermediate, we speculated that such a ligand-free species (<sup>1</sup>3<sup>+</sup>) might not be formed and obtained TS in which the ligand exchange between DMF and TEOA is performed in concert manner (Fig. S2†). However, the TS energy level was shown to be almost the same as complex <sup>1</sup>3<sup>+</sup>, suggesting that both process of stepwise and concerted process could occur.

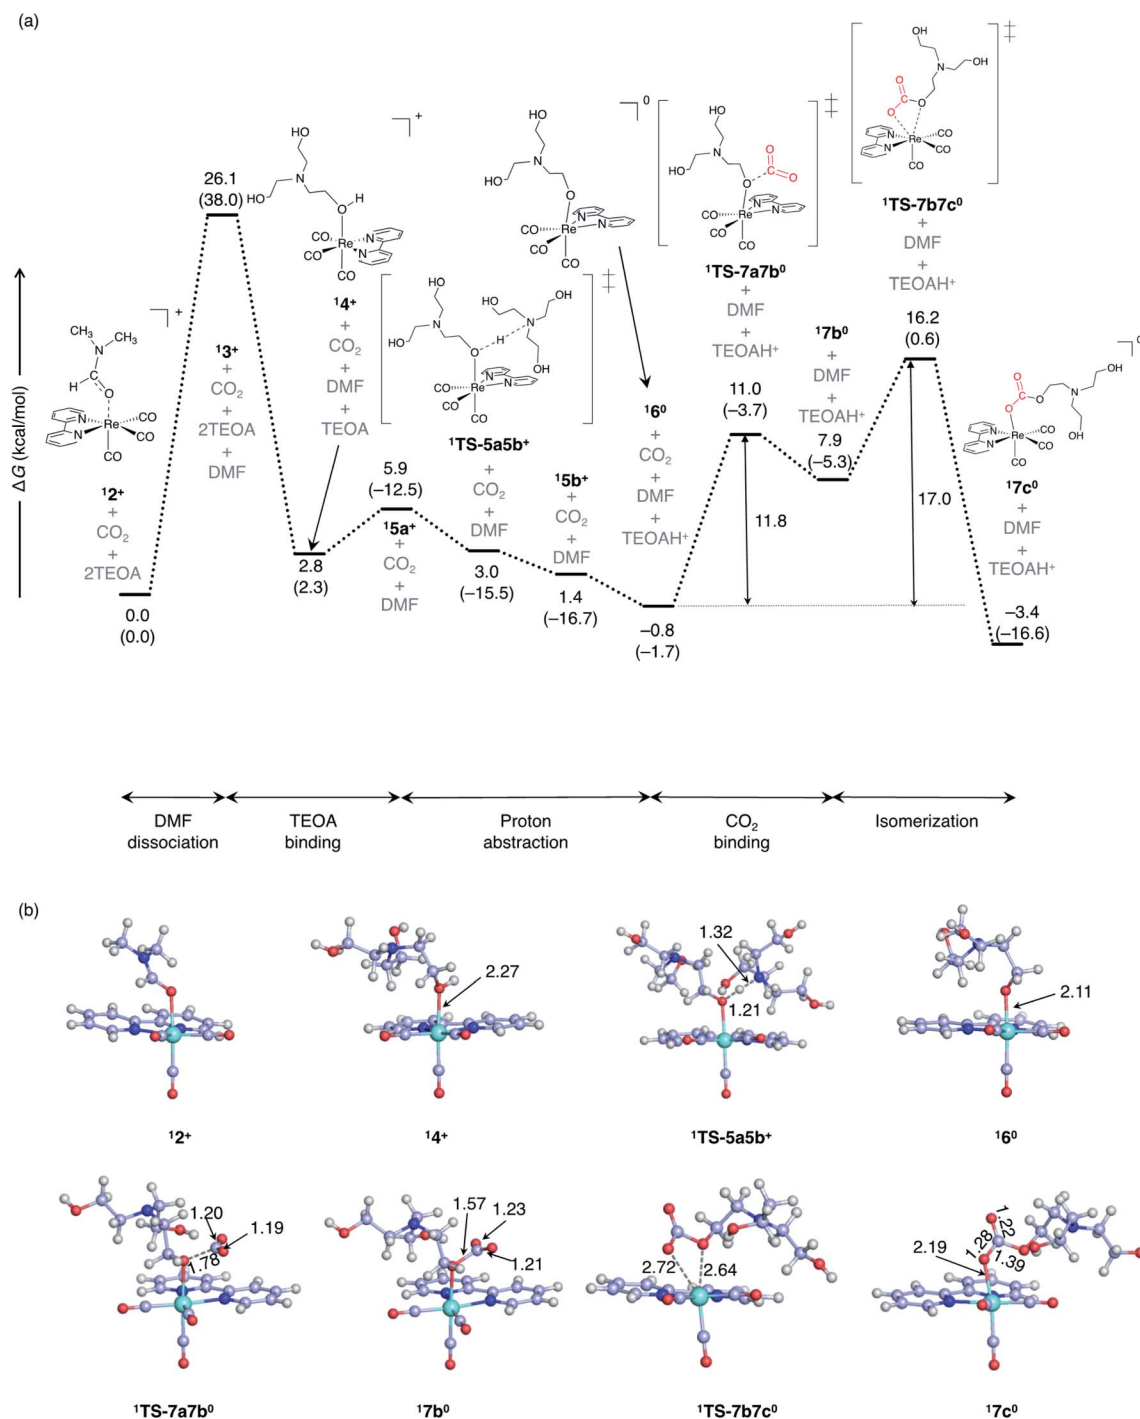

Fig. 5 (a) The free energy profile for the formation of the monoalkyl carbonate complex in the ground electronic state.  $\Delta G$  and  $\Delta H$  (in parentheses) are given in kcal mol<sup>-1</sup>. (b) Optimized key stationary points with the selected bond distances (Å).

Next, the oxygen of the hydroxyl group in TEOA binds to the vacant site of Re to form complex  $^1\mathbf{4}^+$ . Then, another TEOA approaches the complex  $^1\mathbf{4}^+$  and abstracts a proton, thereby resulting in the formation of complex  $^1\mathbf{6}^0$  and  $\text{TEOAH}^+$ . This proton abstraction is a barrierless process at room temperature, where the lower energy of  $^1\mathbf{TS-5a5b}^+$  is lower than that of the corresponding reactant  $^1\mathbf{5a}^+$  is due to the thermal correction (the electronic energy of  $^1\mathbf{5a}^+$  is lower than that of  $^1\mathbf{TS-5a5b}^+$ ; Table S2†). After deprotonation, the bond length between the metal and oxygen decreases from 2.27 Å for  $^1\mathbf{4a}^+$  to 2.11 Å for  $^1\mathbf{6}^0$  (Fig. 5b), which suggests that the TEOA-H ligand binds more tightly to the metal center. Once complex  $^1\mathbf{6}^0$  is formed,  $\text{CO}_2$  approaches the metal-complex, and the carbon of  $\text{CO}_2$  binds to the deprotonated oxygen of TEOA that is bound to Re through transition state  $^1\mathbf{TS-7a7b}^0$ . This  $\text{CO}_2$  binding process is endergonic more than 10 kcal mol $^{-1}$ . The subsequent isomerization from  $^1\mathbf{7b}^0$  to  $^1\mathbf{7c}^0$  is exergonic and leads to lower energy species.

In the  $\text{CO}_2$  binding complex ( $^1\mathbf{7b}^0$ ), the CO bond distance (1.21 and 1.23 Å) is elongated from that in the gas phase (1.16 Å), which suggests that the electron density shifts from the Re-TEOA(H) moiety to the  $\text{CO}_2$ . This is supported by the total atomic Mulliken charge of  $\text{CO}_2$ , namely, -0.37 (which is the sum of the atomic Mulliken charges of the carbon and two oxygens, 0.54, -0.48, and -0.43, respectively).

Overall, the formation of monoalkyl carbonate complex is exergonic process by 3.4 kcal mol $^{-1}$  and the rate-determining step is dissociation of DMF solvent from the Re center. Complex  $^1\mathbf{6}^0$  is the lowest energy intermediate and the barrier height of conversion  $^1\mathbf{7c}^0 \rightarrow ^1\mathbf{6}^0$  is not extremely high, which is consistent with the experimentally observed reversibility of the reaction under an Ar atmosphere.<sup>14</sup>

So far, to elucidate the mechanism  $\text{CO}_2$  reduction by Re complex, different functionals have been used. To investigate the density functional dependence on the free energy profile, we calculated the electronic energies by one local density functional, TPSS,<sup>25</sup> and three hybrid density functionals; M06 (27% of Hartree-Fock (HF) exchange), TPSSH<sup>52</sup> (10% of HF exchange), and B3LYP<sup>53-55</sup> (20% of HF exchange). For TPSS and B3LYP functionals, the dispersion-corrected electron energies were also calculated by including Grimme's empirical dispersion correction (D3).<sup>56</sup> The energy profiles are substantially different from DLPNO-CCSD (T) (Fig. S3†). Among the tested functionals, M06-L, M06, TPSS and TPSS-h shows the closer energy profile to DLPNO-CCSD(T) than B3LYP, B3LYP-D3 and TPSS-D3. The incorporation of the dispersion correction overstabilizes the complexes in the process of  $^1\mathbf{5a}^+ \rightarrow ^1\mathbf{5b}^+$ .

The reaction pathway for a monoalkyl carbonate complex formation under light irradiation starting from the one-electron-reduced complex is illustrated in Fig. 6. Once  $\text{Br}^-$  dissociates from the Re-Br complex into the DMF-TEOA solution during the photocatalytic reaction, it is less likely to re-coordinate to the Re center due to the very low concentration of  $\text{Br}^-$ . Therefore, the DMF coordination complex is described as the reaction initiation complex in the free energy profile (Fig. 5). Mechanistically, the singlet ground state pathway and the one-electron-reduced doublet pathways are the same. As the maximum barrier of the formation of monoalkyl carbonate

complex in doublet spin state is smaller than singlet spin state, the formation more faciliately occur in doublet spin state.

#### Formation of a two-electron-reduced complex from $^1\mathbf{7c}^0$ .

Previous theoretical studies have shown that the formation of CO and  $\text{H}_2\text{O}$  involves  $\text{CO}_2$  binding to the Re center.<sup>19,57</sup> This was also observed for our previously investigated Mn complex.<sup>58</sup> According to our calculations,  $\text{CO}_2$  binding to metal center requires the formation of a two-electron reduced Re complex ( $^1\mathbf{3}^-$ ).

In the case of electrocatalysts, the mechanism of  $\text{CO}_2$  reduction has been elucidated by considering the electron transfer only from the electrode in the electron reduction of the Re-complex.<sup>57,59</sup> On the other hand, in the case of homogeneous photocatalysis, it is necessary to consider electron transfer from other molecules in reaction mixture. In this study, we mapped the reduction potentials of intermediates in the  $\text{CO}_2$  reduction reaction to clarify the electron transfer between molecules (Fig. 3). From bottom to top, the reduction potentials of the lowest triplet, non-reduced singlet, and one-electron-reduced doublet complexes are shown. As a general trend, the triplet has the highest oxidation power, followed by the unreduced singlet, and the one-electron-reduced doublet species has the lowest oxidation power. Electron transfer is possible only from a species with a lower reduction potential to a species with higher reduction potential.

The calculated redox potential and free energy profiles suggest two possible pathways for the formation of complex  $^2\mathbf{7c}^-$ . In the first pathway, DMF coordinated complex  $^1\mathbf{2}^+$  is electronically excited and reduced by TEOA. The generated one electron reduced complex,  $^2\mathbf{2}^0$ , is then converted to  $^2\mathbf{7c}^-$  as illustrated in Fig. 6. In the second possible pathway, the ground-state complex,  $^1\mathbf{7c}^0$ , is first generated (Fig. 5). Then, the complex  $^1\mathbf{7c}^0$  is photoexcited and electronically reduced from TEOA (Fig. 6). The pathway in which the ground state complex  $^1\mathbf{7c}^0$  is reduced by the one-electron reduced species  $^2\mathbf{1}^-$ , is thermodynamically unfavorable process according to the calculated reduction potentials (Fig. 3).

The most favorable pathway for the formation of the two-electron-reduced complex,  $^1\mathbf{3}^-$ , is as follows (Fig. 7a): once a one-electron-reduced complex of monoalkyl carbonate,  $^2\mathbf{7c}^-$ , is formed, a proton is transferred from  $\text{TEOAH}^+$  to  $^2\mathbf{7c}^-$  through a TS ( $^2\mathbf{TS-8a8b}^0$ ) (barrier height; ~15 kcal mol $^{-1}$ ), thereby resulting in the formation of complex  $^2\mathbf{9}^0$ . Here, complex  $^2\mathbf{TS-8a8b}^0$  is of lower energy than the corresponding product,  $^2\mathbf{8b}^0$ , due to the thermal correction, where the electronic energies of  $^2\mathbf{TS-8a8b}^0$  and  $^2\mathbf{8b}^0$  are almost equivalent (Table S2†). Then, the complex  $^2\mathbf{9}^0$  (-1.49 V) is reduced by a doublet species (Fig. 3) such as  $^2\mathbf{7c}^-$  (-1.87 V). This reduction accompanies the dissociation of the neutral monoalkyl hydrogencarbonate ligand.

**Formation of CO and  $\text{H}_2\text{O}$ .** The process of water production in the presence of TEOA has been investigated in past study,<sup>19</sup> so we will review the process.

Once two-electron reduced complex  $^1\mathbf{3}^-$  is formed,  $\text{CO}_2$  binds to the Re center in an endergonic process (Fig. S4a†). In this process, the geometry of  $\text{CO}_2$  changes from linear to bent form with elongation of the C-O bond (1.16 Å  $\rightarrow$  1.23 Å; Fig. S4b†), which suggests that the electron shifts from the Re

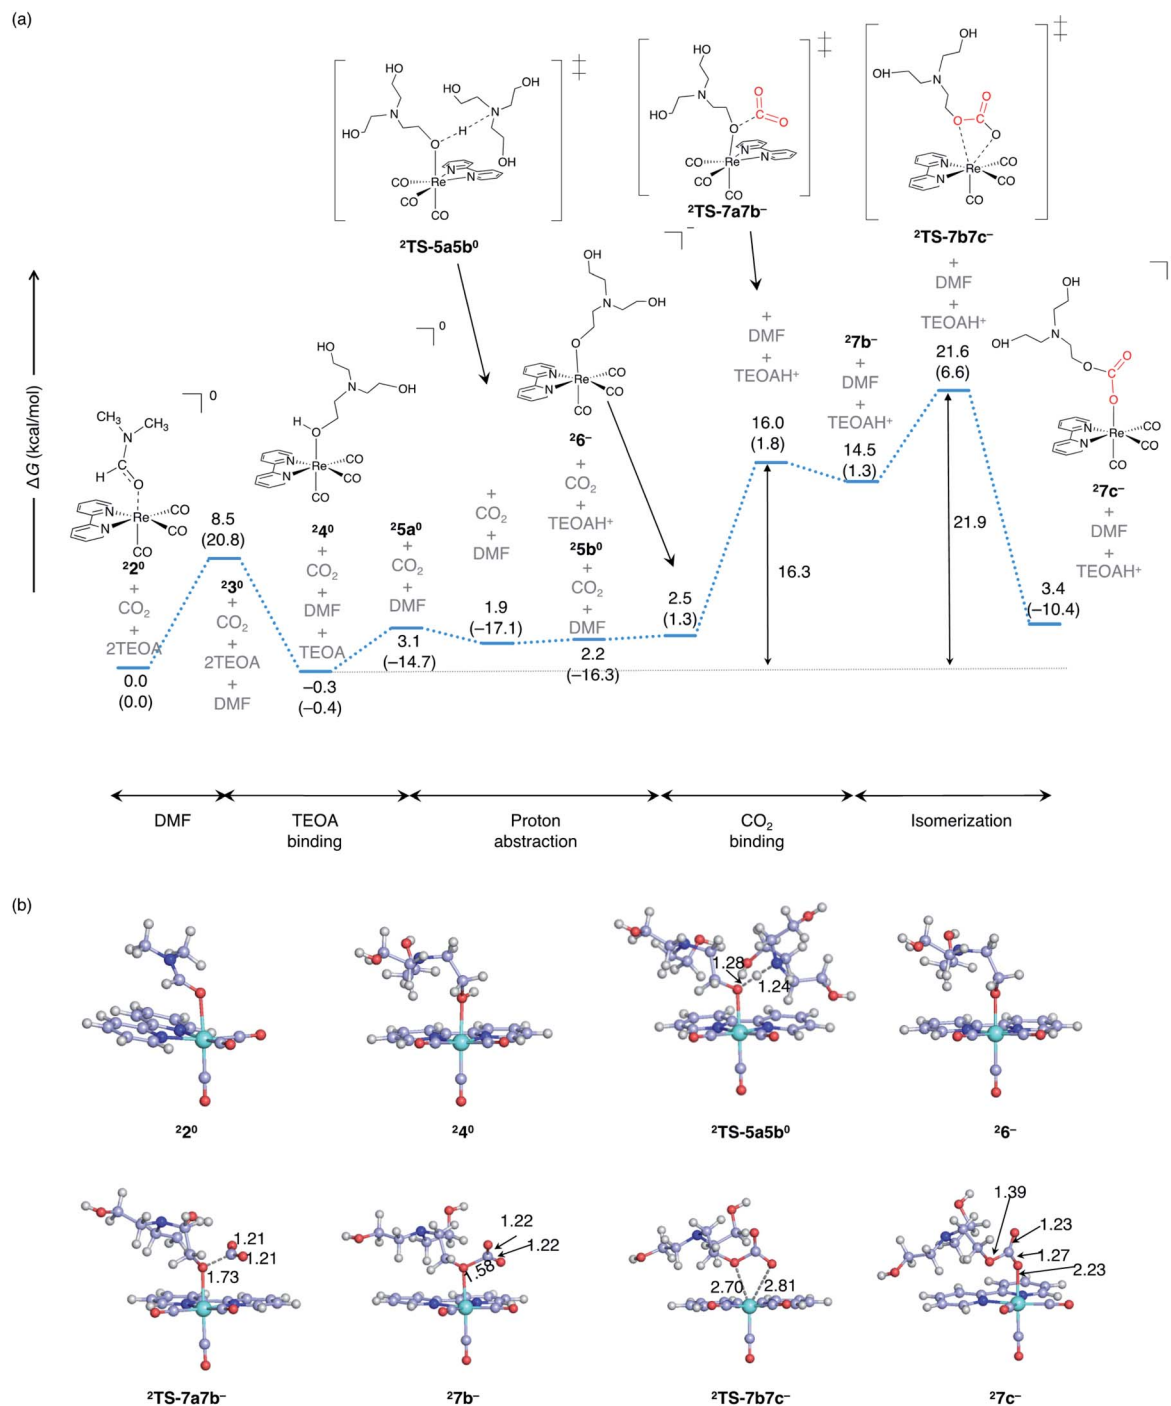

Fig. 6 (a) The free energy profile for the formation of the monoalkyl carbonate complex starting from the one-electron-reduced complex.  $\Delta G$  and  $\Delta H$  (in parentheses) are given in kcal mol<sup>-1</sup>. (b) Optimized key stationary points with the selected bond distances (Å). The blue bars represent one-electron-reduced doublet Re complexes.

complex to CO<sub>2</sub>. The calculated barrier (12.7 kcal mol<sup>-1</sup>) is lower than the previously estimated barrier using M06-L/6-311+G(2df,p), 16.1 kcal mol<sup>-1</sup>.<sup>19</sup> Then, TEOAH<sup>+</sup> approaches one of the negatively charged oxygen atoms of CO<sub>2</sub> and protonates it, leading to the formation of metallocarboxylic acid, **12**<sup>0</sup>. In the next step, the TEOAH<sup>+</sup> approaches the intermediate, namely, **12**<sup>0</sup>, and a proton is transferred from TEOAH<sup>+</sup> to the

COOH group of **12**<sup>0</sup> through **1TS-13a13b**<sup>+</sup>, resulting in C–O bond cleavage with the generation of a tetracarbonyl complex, **14**<sup>+</sup>, and water. Both proton transfer TSs are characterized by large imaginary frequencies (935 cm<sup>-1</sup> for **1TS-13a13b**<sup>+</sup>, and 1374 cm<sup>-1</sup> for **1TS-11a11b**<sup>0</sup>; Table S1†). The barrier height of the second proton transfer (17.1 kcal mol<sup>-1</sup>) estimated at LRP-

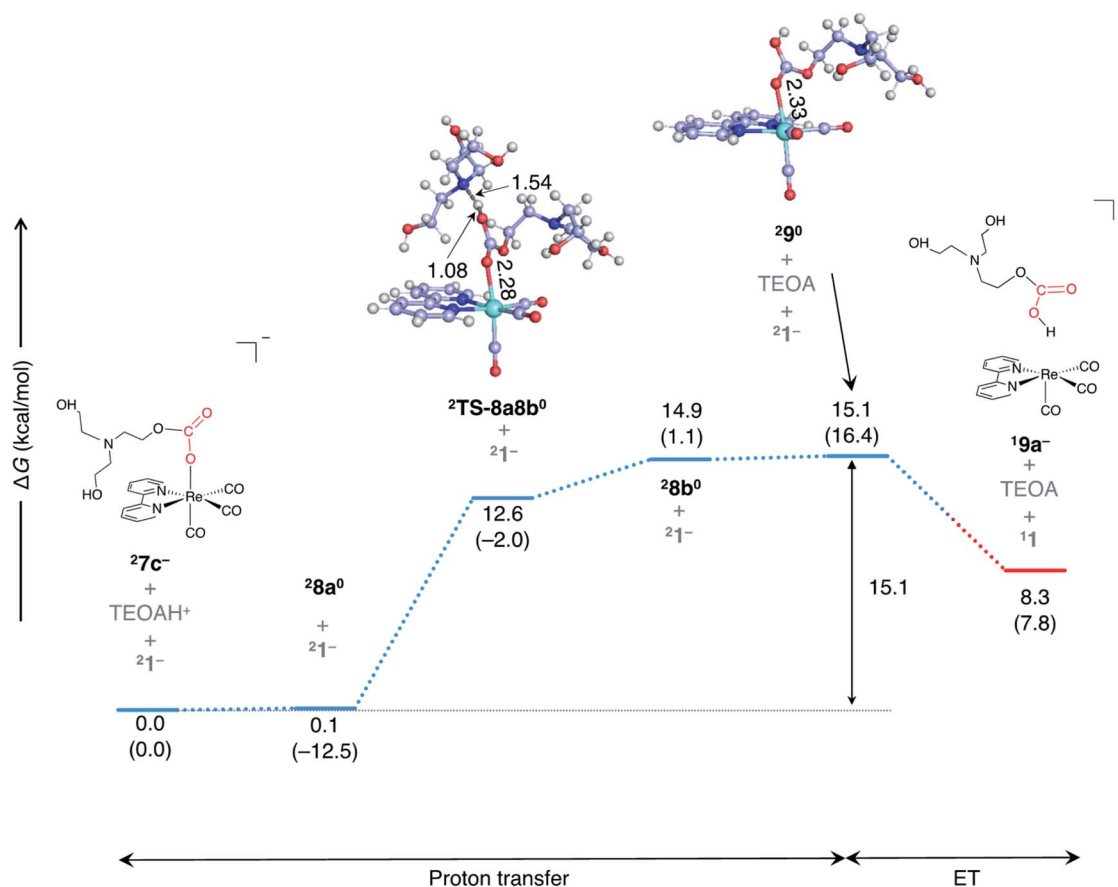

Fig. 7 The free energy profile for the formation of the monoalkyl carbonate complex in the ground electronic state.  $\Delta G$  and  $\Delta H$  (in parentheses) are given in kcal mol<sup>-1</sup>. The bond distances for the optimized geometry are given in angstrom.

CCSD(T) is close to  $^{11}\text{e}^-$  previously estimated barrier (18.2 kcal mol<sup>-1</sup>)<sup>19</sup> at M06-L/6-311+G(2df,p) level.

The generated singly positively charged tetracarbonyl complex,  $^{11}\text{14}^+$  ( $E^\circ(^{11}\text{14}^+/^{11}\text{14}^0) = -1.22$  V, Fig. 3) can be reduced by one-electron-reduced complex, such as  $^{27}\text{c}^-$ . According to the free energy profile at the LPNO-CCSD (T) level, the CO ligand of  $^{21}\text{14}^0$  dissociates easily (Fig. S5†).

In the CO formation reaction, the carbon of CO<sub>2</sub>, not the oxygen, binds to the Re center and the reaction proceeds. One of reasons is as follows. CO<sub>2</sub> binds to Re *via* oxygen in the non-reduced and one-electron-reduced states, while it cannot bind *via* oxygen in the two-electron-reduced state, but instead binds *via* carbon (Fig. S6†). As can be seen from the Mulliken charge, when bonding through carbon in the two-electron reduced state, oxygen exhibits the most negative charge. Therefore, it is the most desirable proton acceptor. The CO<sub>2</sub> reduction reaction initiated by the coordination of CO<sub>2</sub> carbon to metal is not only seen in group 7 elements such as Mn and Re, but also in group 6 elements such as Mo and W.<sup>60,61</sup>

### 3.2 Formation of CO and HCO<sub>3</sub><sup>-</sup>

The formation of HCO<sub>3</sub><sup>-</sup> from metalcarboxylic acid ( $^{11}\text{12}^0$ ) has been proposed in the previous theoretical study.<sup>26</sup> However, this process does not assume that the monoalkyl carbonate complex

is an active species. A possible reaction pathway assuming that the monoalkyl carbonate complex as a precursor is as follows (Fig. 8).

First, the carbon of the monoalkyl hydrogen carbonate ligands, which dissociated in the second electron reduction (Fig. 7), recombines with the Re center to form metalcarboxylic acid, which is denoted as  $^{19}\text{b}^-$  (Fig. 8b). Next, CO<sub>2</sub> binds to the oxygen of the COOH group to form HCO<sub>3</sub><sup>-</sup> and a tetracarbonyl complex. The enthalpy barriers for the second step, 22.4 kcal mol<sup>-1</sup> (Fig. 8b) are similar to the previous reported enthalpy barrier, 23.9 kcal mol<sup>-1</sup> estimated at the M06-L/LANL08F(Re), 6-31+G\*\* (H,N,C, and O) level of theory.<sup>26</sup> Since anionic species are produced in this reaction, the effect of the diffuse function was investigated using the DLPNO-CCSD(T) method with def2-TZVPD basis set. The calculated barrier height is 23.0 kcal mol<sup>-1</sup>, which is quite close to the value of 23.3 kcal mol<sup>-1</sup> calculated using the def2-TZVP basis set, suggesting the reaction barrier properly estimated without diffuse function.

The formation of HCO<sub>3</sub><sup>-</sup> (Fig. 8) has a higher reaction barrier than formation of water molecules (Fig. S4†). However, since the monoalkyl hydrogen carbonate ligand that is dissociated with the reduction of  $^{29}\text{g}^0$  (Fig. 7) has not been detected, this pathway cannot be excluded as a candidate for the formation of

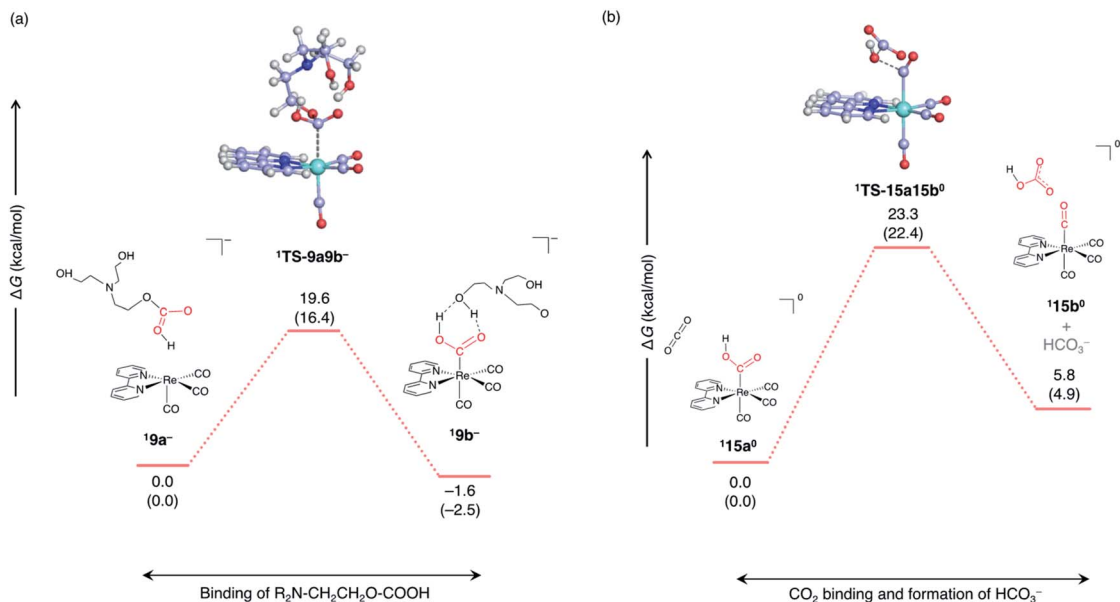

Fig. 8 Free energy profile for the formation of the tetracarbonyl complex and  $\text{HCO}_3^-$ .  $\Delta G$  and  $\Delta H$  (in parentheses) are given in  $\text{kcal mol}^{-1}$ .

$\text{CO}$  and  $\text{HCO}_3^-$ . Also, one proton is required for the formation  $\text{HCO}_3^-$  (eqn (4)), while two protons are required for the formation of water (eqn (3), Fig. S4†). Based on the stoichiometry, it is possible that the formation rate of  $\text{HCO}_3^-$  increases when  $\text{TEOAH}^+$  is not present at a sufficient concentration.

Next, we examined whether the  $\text{HCO}_3^-$  can be formed *via* one-electron reduction of the Re catalyst. The transition state for the rebinding of protonated monoalkyl carbonate ligands to the one-electron reduced complex ( $^2\text{3}^0$ ) was explored; however, such a state has not been detected. Instead, a TS was obtained

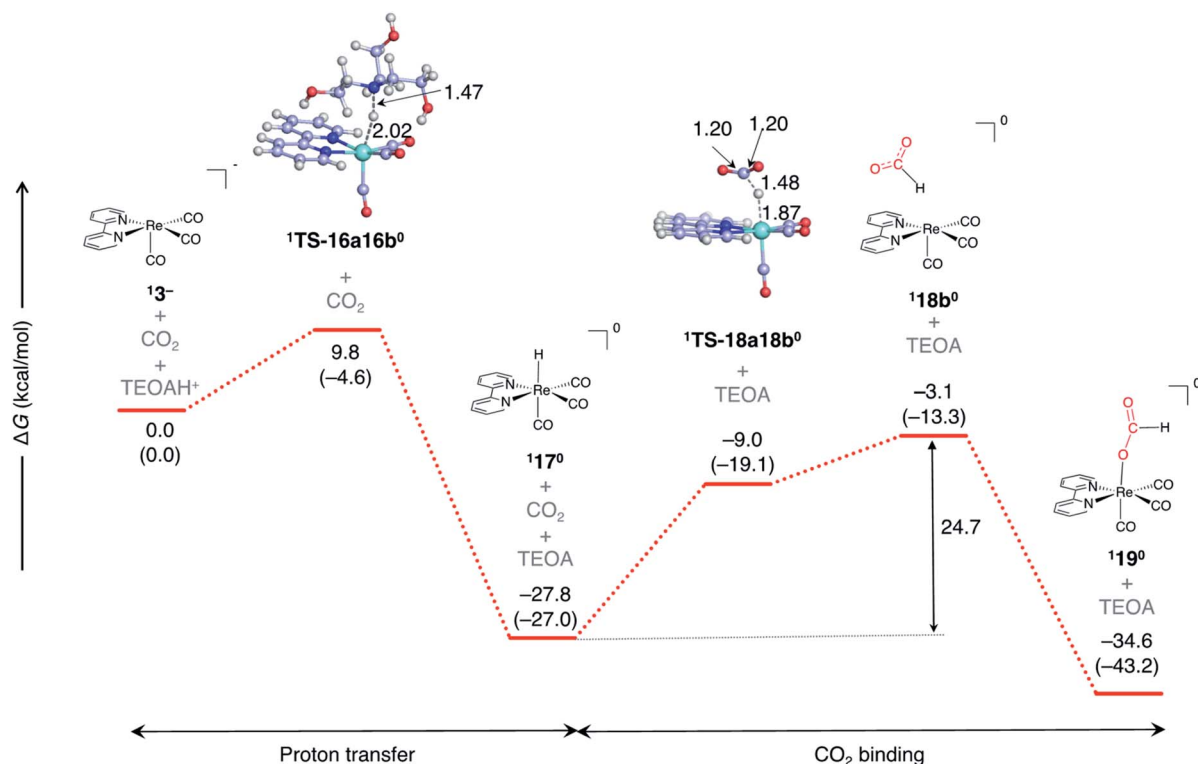

Fig. 9 Free energy profile for the formation of the formate complex from the tricarbonyl Re complex.  $\Delta G$  and  $\Delta H$  (in parentheses) are given in  $\text{kcal mol}^{-1}$ . The red bars represent two-electron-reduced singlet Re complexes.



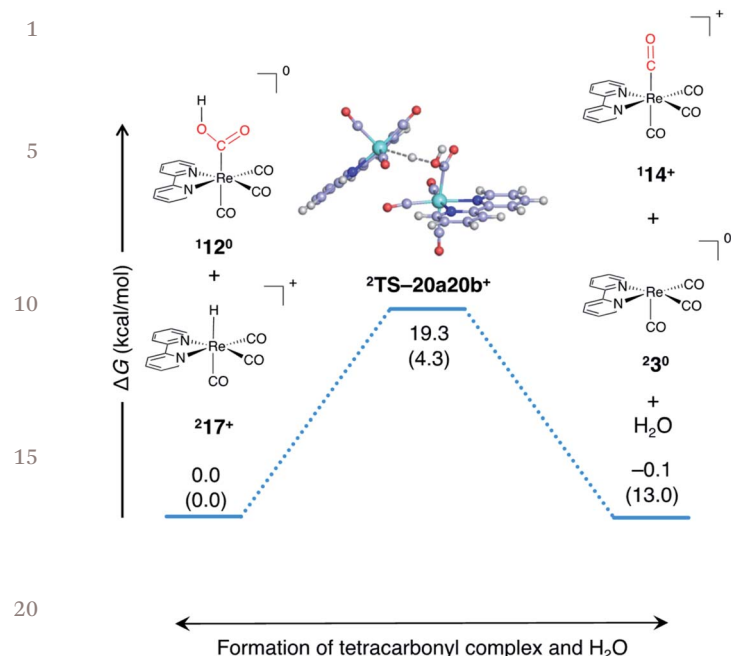

Fig. 10 Free energy profile of the formation of the tetracarbonyl complex when the one-electron oxidized hydride complex acts as a proton donor.  $\Delta G$  and  $\Delta H$  (in parentheses) are given in kcal mol<sup>-1</sup>.

in which COOH and TEOA-H ligands were interchangeably ligated on the Re center was identified.

The protonation significantly changes the electronic structure of the complex and affects to the progress of the reaction.<sup>62,63</sup> We investigated whether the monoalkyl carbonate ligand binds to the Re-center of complex  $^1\mathbf{3}^-$  prior to protonation, as illustrated in Fig. 7. As a result, neither a 6-coordinated state in which the carbon of the monoalkyl carbonate ligand coordinates to Re nor a 7-coordinated state in which both C and O coordinates to the Re center was not obtained. Thus, the protonation, as illustrated in Fig. 7, is critical for the formation of the Re–C bond, which leads to the formation of metalcarboxylic acid.

### 3.3 Formation of the Re–formate complex as a side product

The Re–formate complex is a side product of CO<sub>2</sub> reduction and this process has not been suggested by previous theoretical study.<sup>19</sup> A plausible reaction pathway for its formation is as follows (Fig. 9). First, proton transfer occurs from TEOAH<sup>+</sup> to the Re center of the complex  $^1\mathbf{2b}$ , which generates Re–hydride complex  $^1\mathbf{5b}^0$ . In the next step, CO<sub>2</sub> is reduced by attack of the hydride on the carbon of CO<sub>2</sub> via  $^1\mathbf{TS-16a16b}$  to form the HCOO<sup>-</sup> species. The formed species is higher in energy and isomerizes to form a lower energy Re–formate complex  $^1\mathbf{17c}$ , where the oxygen of formate interacts with the Re-center.

The highest barrier for the formate formation from the complex  $^1\mathbf{3}^-$  is the CO<sub>2</sub> reduction step (barrier height: 24.7 kcal mol<sup>-1</sup>), which is higher than the highest energy barrier of CO formation (17.1 kcal mol<sup>-1</sup>; Fig. S4†). This qualitatively shows that CO is the main product.

Starting from complex  $^1\mathbf{3}^-$ , the barrier height of the formation of the hydride complex ( $^1\mathbf{TS-16a16b}^0$ ) is lower than that of the formation of metalcarboxylic acid ( $^1\mathbf{TS-10a10b}^-$ ). In addition, the back reaction, namely, deprotonation ( $^1\mathbf{17b}^0 \rightarrow ^1\mathbf{3}^-$ ), is unlikely to occur. These findings suggest that the amount of transient formation of the hydride complex exceeds that of metalcarboxylic acid. Thus,  $^1\mathbf{17}^0$  is expected to be consumed in the other reaction process. A possible reaction pathway for its consumption is as follows. First, the hydride complex ( $E^\circ = 1.01$  V) is oxidized by the one electron reduced complex such as  $^2\mathbf{7c}^-$ . Then, the oxidized hydride complex ( $^2\mathbf{17}^+$ ) is utilized as a proton donor to convert the metalcarboxylic acid ( $^1\mathbf{12}^0$ ) into a tetracarbonyl complex ( $^1\mathbf{14}^+$ ). The barrier height of this process was calculated as 19.3 kcal mol<sup>-1</sup> (Fig. 10), which is 2.2 kcal mol<sup>-1</sup> lower than that of the process in which TEOAH<sup>+</sup> acts as a proton donor (17.1 kcal mol<sup>-1</sup>, Fig. S4†). The unoxidized hydride complex, namely,  $^1\mathbf{17}^0$ , cannot act as a proton donor, as demonstrated by the high reaction barrier (Fig. S7†).

## 4. Conclusions

The photochemical conversion mechanisms of CO<sub>2</sub> to CO + H<sub>2</sub>O and CO<sub>2</sub> to CO + HCO<sub>3</sub><sup>-</sup> by the Re complex in the presence of TEOA have been investigated *via* DFT methods and DLPNO-CCSD(T) method. A plausible reaction pathway was suggested based on the calculated thermodynamics, kinetics, and the reduction potential of key intermediates.

It was determined that the formation of the monoalkyl carbonate complex involves (1) TEOA binding to the Re center, (2) CO<sub>2</sub> binding to the TEOA that is bound to the Re complex, and (3) the isomerization. The isomerization step was the rate determining step in the formation of the monoalkyl carbonate complex.

Two electron reduction of Re-complex is necessary to reduce CO<sub>2</sub>. In the conversion of CO<sub>2</sub> to CO by light irradiation in the presence of TEOA, the DMF coordination complex is first reduced by TEOA and converted into the monoalkyl carbonate complex *via* doublet pathway. Then, the second electron reduction occurs following the protonation of monoalkyl carbonate complex.

The reduction of CO<sub>2</sub> to CO + H<sub>2</sub>O was kinetically advantageous over the formation of CO + HCO<sub>3</sub><sup>-</sup> with the monoalkyl carbonate complex as precursor. However, while one proton is required to produce CO + HCO<sub>3</sub><sup>-</sup>, two protons are required to produce CO + H<sub>2</sub>O. Hence, the ratio of production is expected to depend on the proton concentration.

The formation of a Re–formate complex as a side product was kinetically less likely than the formation of CO + H<sub>2</sub>O. However, the barrier for intermediate Re–hydride complex formation was rather low. As one of the consumption pathways of the produced hydride complex, we proposed the possibility of its involvement in the production of water as a proton donor after the oxidation.

In this study, an implicit solvation model was used, and a reaction pathway was proposed under the assumption that the TEOA conformation does not significantly affect the reaction.



Therefore, to determine the correctness of the proposed reaction pathway, more detailed experimental studies must be conducted using spectroscopic techniques.

## Conflicts of interest

There are no conflicts of interest to declare.

## Acknowledgements

The authors are grateful to Osamu Ishitani for insightful comments and discussions. This work was supported in part by the World Premier International Research Center Initiative (WPI) and Grants-in-Aid for Scientific Research (KAKENHI JP18K05297). Computer resources at the Academic Center for Computing and Media Studies at Kyoto University, Research Center of Computer Science at the Institute for Molecular Science are also acknowledged.

## References

- 1 D. Archer, M. Eby, V. Brovkin, A. Ridgwell, L. Cao, U. Mikolajewicz, K. Caldeira, K. Matsumoto, G. Munhoven, A. Montenegro and K. Tokos, Atmospheric Lifetime of Fossil Fuel Carbon Dioxide, *Annu. Rev. Earth Planet. Sci.*, 2009, **37**, 117–134.
- 2 T. Gasser, C. Guivarch, K. Tachiiri, C. D. Jones and P. Ciais, Negative emissions physically needed to keep global warming below 2 degrees C, *Nat. Commun.*, 2015, **6**.
- 3 M. Vučelić, Y. Ohrn and J. R. Sabin, Ab initio calculation of the vibrational and electronic properties of carbon dioxide, *J. Chem. Phys.*, 1973, **59**, 003–3007.
- 4 G. L. Gutsev, R. J. Bartlett and R. N. Compton, Electron affinities of CO<sub>2</sub>, OCS, and CS<sub>2</sub>, *J. Chem. Phys.*, 1998, **108**, 6756–6762.
- 5 W. H. Wang, Y. Himeda, J. T. Muckerman, G. F. Manbeck and E. Fujita, CO<sub>2</sub> Hydrogenation to Formate and Methanol as an Alternative to Photo- and Electrochemical CO<sub>2</sub> Reduction, *Chem. Rev.*, 2015, **115**, 12936–12973.
- 6 Y. Yamazaki, H. Takeda and O. Ishitani, Photocatalytic reduction of CO<sub>2</sub> using metal complexes, *J. Photochem. Photobiol., C*, 2015, **25**, 106–137.
- 7 H. Takeda and O. Ishitani, Development of efficient photocatalytic systems for CO<sub>2</sub> reduction using mononuclear and multinuclear metal complexes based on mechanistic studies, *Coord. Chem. Rev.*, 2010, **254**, 346–354.
- 8 Y. Kuramochi, O. Ishitani and H. Ishida, Reaction mechanisms of catalytic photochemical CO<sub>2</sub> reduction using Re(I) and Ru(II) complexes, *Coord. Chem. Rev.*, 2018, **373**, 333–356.
- 9 M. D. Sampson, A. D. Nguyen, K. A. Grice, C. E. Moore, A. L. Rheingold and C. P. Kubiak, Manganese catalysts with bulky bipyridine ligands for the electrocatalytic reduction of carbon dioxide: eliminating dimerization and altering catalysis, *J. Am. Chem. Soc.*, 2014, **136**, 5460–5471.
- 10 A. Dubey, L. Nencini, R. R. Fayzullin, C. Nervi and J. R. Khusnutdinova, Bio-Inspired Mn(I) Complexes for the Hydrogenation of CO<sub>2</sub> to Formate and Formamide, *ACS Catal.*, 2017, **7**, 3864–3868.
- 11 J. Hawecker, J. M. Lehn and R. Ziessel, Photochemical and Electrochemical Reduction of Carbon-Dioxide to Carbon-Monoxide Mediated by (2,2'-Bipyridine) Tricarbonylchlororhenium(I) and Related Complexes as Homogeneous Catalysts, *Helv. Chim. Acta*, 1986, **69**, 1990–2012.
- 12 B. P. Sullivan, C. M. Bolinger, D. Conrad, W. J. Vining and T. J. Meyer, One-Electron and 2-Electron Pathways in the Electrocatalytic Reduction of CO<sub>2</sub> by Fac-Re(2,2'-Bipyridine)(CO)<sub>3</sub>Cl, *J. Chem. Soc., Chem. Commun.*, 1985, 1414–1415.
- 13 Y. Tamaki, K. Koike, T. Morimoto and O. Ishitani, Substantial improvement in the efficiency and durability of a photocatalyst for carbon dioxide reduction using a benzoimidazole derivative as an electron donor, *J. Catal.*, 2013, **304**, 22–28.
- 14 T. Morimoto, T. Nakajima, S. Sawa, R. Nakanishi, D. Imori and O. Ishitani, CO<sub>2</sub> capture by a rhenium(I) complex with the aid of triethanolamine, *J. Am. Chem. Soc.*, 2013, **135**, 16825–16828.
- 15 H. Koizumi, H. Chiba, A. Sugihara, M. Iwamura, K. Nozaki and O. Ishitani, CO<sub>2</sub> capture by Mn(i) and Re(i) complexes with a deprotonated triethanolamine ligand, *Chem. Sci.*, 2019, **10**, 3080–3088.
- 16 Y. Tamaki and O. Ishitani, Supramolecular Photocatalysts for the Reduction of CO<sub>2</sub>, *ACS Catal.*, 2017, **7**, 3394–3409.
- 17 K. Ohkubo, Y. Yamazaki, T. Nakashima, Y. Tamaki, K. Koike and O. Ishitani, Photocatalyses of Ru(II)-Re(I) binuclear complexes connected through two ethylene chains for CO<sub>2</sub> reduction, *J. Catal.*, 2016, **343**, 278–289.
- 18 T. Nakajima, Y. Tamaki, K. Ueno, E. Kato, T. Nishikawa, K. Ohkubo, Y. Yamazaki, T. Morimoto and O. Ishitani, Photocatalytic Reduction of Low Concentration of CO<sub>2</sub>, *J. Am. Chem. Soc.*, 2016, **138**, 13818–13821.
- 19 T. W. Schneider, M. Z. Ertem, J. T. Muckerman and A. M. Angeles-Boza, Mechanism of Photocatalytic Reduction of CO<sub>2</sub> by Re(bpy)(CO)<sub>3</sub>Cl from Differences in Carbon Isotope Discrimination, *ACS Catal.*, 2016, **6**, 5473–5481.
- 20 C. Riplinger, M. D. Sampson, A. M. Ritzmann, C. P. Kubiak and E. A. Carter, Mechanistic contrasts between manganese and rhenium bipyridine electrocatalysts for the reduction of carbon dioxide, *J. Am. Chem. Soc.*, 2014, **136**, 16285–16298.
- 21 M. Saitow, U. Becker, C. Riplinger, E. F. Valeev and F. Neese, A new near-linear scaling, efficient and accurate, open-shell domain-based local pair natural orbital coupled cluster singles and doubles theory, *J. Chem. Phys.*, 2017, **146**, 164105.
- 22 Y. Guo, C. Riplinger, U. Becker, D. G. Liakos, Y. Minenkov, L. Cavallo and F. Neese, Communication: An improved linear scaling perturbative triples correction for the domain based local pair-natural orbital based singles and doubles coupled cluster method [DLPNO-CCSD(T)], *J. Chem. Phys.*, 2018, **148**, 011101.

- 23 M. J. Frisch, G. W. Trucks, H. B. Schlegel, G. E. Scuseria, M. A. Robb, J. R. Cheeseman, G. Scalmani, V. Barone, B. Mennucci, G. A. Petersson, H. Nakatsuji, M. Caricato, X. Li, H. P. Hratchian, A. F. Izmaylov, J. Bloino, G. Zheng, J. L. Sonnenberg, M. Hada, M. Ehara, K. Toyota, R. Fukuda, J. Hasegawa, M. Ishida, T. Nakajima, Y. Honda, O. Kitao, H. Nakai, T. Vreven, J. A. Montgomery Jr, J. E. Peralta, F. Ogliaro, M. Bearpark, J. J. Heyd, E. Brothers, K. N. Kudin, V. N. Staroverov, R. Kobayashi, J. Normand, K. Raghavachari, A. Rendell, J. C. Burant, S. S. Iyengar, J. Tomasi, M. Cossi, N. Rega, J. M. Millam, M. Klene, J. E. Knox, J. B. Cross, V. Bakken, C. Adamo, J. Jaramillo, R. Gomperts, R. E. Stratmann, O. Yazyev, A. J. Austin, R. Cammi, C. Pomelli, J. W. Ochterski, R. L. Martin, K. Morokuma, V. G. Zakrzewski, G. A. Voth, P. Salvador, J. J. Dannenberg, S. Dapprich, A. D. Daniels, O. Farkas, J. B. Foresman, J. V. Ortiz, J. Cioslowski and D. J. Fox, *Gaussian 09, Revision E.01*, Gaussian, Inc.: Wallingford, CT2009.
- 24 F. Neese, F. Wennmohs, U. Becker and C. Riplinger, The ORCA quantum chemistry program package, *J. Chem. Phys.*, 2020, **152**, 224108.
- 25 J. M. Tao, J. P. Perdew, V. N. Staroverov and G. E. Scuseria, Climbing the Density Functional Ladder: Nonempirical Meta-Generalized Gradient Approximation Designed for Molecules and Solids, *Phys. Rev. Lett.*, 2003, **91**, 146401.
- 26 J. Agarwal, B. C. Sanders, E. Fujita, H. F. Schaefer, T. C. Harrop and J. T. Muckerman, Exploring the intermediates of photochemical CO<sub>2</sub> reduction: reaction of Re(dmb)(CO)<sub>3</sub> COOH with CO<sub>2</sub>, *Chem. Commun.*, 2012, **48**, 6797–6799.
- 27 M. Dolg, U. Wedig, H. Stoll and H. Preuss, Abinitio Pseudopotential Study of the 1st Row Transition-Metal Monoxides and Iron Monohydride, *J. Chem. Phys.*, 1987, **86**, 2123–2131.
- 28 W. J. Hehre, R. Ditchfield and J. A. Pople, Self-Consistent Molecular-Orbital Methods .12. Further Extensions of Gaussian-Type Basis Sets for Use in Molecular-Orbital Studies of Organic-Molecules, *J. Chem. Phys.*, 1972, **56**, 2257–2261.
- 29 A. V. Marenich, C. J. Cramer and D. G. Truhlar, Universal Solvation Model Based on the Generalized Born Approximation with Asymmetric Descreening, *J. Chem. Theory Comput.*, 2009, **5**, 2447–2464.
- 30 K. Fukui, The Path of Chemical-Reactions - the IRC Approach, *Acc. Chem. Res.*, 1981, **14**, 363–368.
- 31 F. Weigend, Accurate Coulomb-fitting basis sets for H to Rn, *Phys. Chem. Chem. Phys.*, 2006, **8**, 1057–1065.
- 32 A. Hellweg, C. Hattig, S. Hofener and W. Klopper, Optimized accurate auxiliary basis sets for RI-MP2 and RI-CC2 calculations for the atoms Rb to Rn, *Theor. Chem. Acc.*, 2007, **117**, 587–597.
- 33 S. Mallick, B. Roy and P. Kumar, A comparison of DLPNO-CCSD(T) and CCSD(T) method for the determination of the energetics of hydrogen atom transfer reactions, *Comput. Theor. Chem.*, 2020, **1187**, 112934.
- 34 B. M. Floser, Y. Guo, C. Riplinger, F. Tuczek and F. Neese, Detailed Pair Natural Orbital-Based Coupled Cluster Studies of Spin Crossover Energetics, *J. Chem. Theory Comput.*, 2020, **16**, 2224–2235.
- 35 B. Mondal, F. Neese and S. Ye, Control in the Rate-Determining Step Provides a Promising Strategy To Develop New Catalysts for CO<sub>2</sub> Hydrogenation: A Local Pair Natural Orbital Coupled Cluster Theory Study, *Inorg. Chem.*, 2015, **54**, 7192–7198.
- 36 S. Maeda and K. Morokuma, Finding Reaction Pathways of Type A+B → X: Toward Systematic Prediction of Reaction Mechanisms, *J. Chem. Theory Comput.*, 2011, **7**, 2335–2345.
- 37 O. Hammerich, *Organic electrochemistry*, CRC press, 2016, p. 250.
- 38 C. P. Kelly, C. J. Cramer and D. G. Truhlar, Aqueous solvation free energies of ions and ion-water clusters based on an accurate value for the absolute aqueous solvation free energy of the proton, *J. Phys. Chem. B*, 2006, **110**, 16066–16081.
- 39 C. P. Kelly, C. J. Cramer and D. G. Truhlar, Single-ion solvation free energies and the normal hydrogen electrode potential in methanol, acetonitrile, and dimethyl sulfoxide, *J. Phys. Chem. B*, 2007, **111**, 408–422.
- 40 A. A. Isse and A. Gennaro, Absolute Potential of the Standard Hydrogen Electrode and the Problem of Interconversion of Potentials in Different Solvents, *J. Phys. Chem. B*, 2010, **114**, 7894–7899.
- 41 J. W. Diggle and A. J. Parker, Liquid Junction Potentials in Electrochemical Cells Involving a Dissimilar Solvent Junction, *Aust. J. Chem.*, 1974, **27**, 1617–1621.
- 42 A. V. Marenich, J. M. Ho, M. L. Coote, C. J. Cramer and D. G. Truhlar, Computational electrochemistry: prediction of liquid-phase reduction potentials, *Phys. Chem. Chem. Phys.*, 2014, **16**, 15068–15106.
- 43 J. Ho, Are thermodynamic cycles necessary for continuum solvent calculation of pK<sub>a</sub>s as and reduction potentials?, *Phys. Chem. Chem. Phys.*, 2015, **17**, 2859–2868.
- 44 P. Lang, R. Giereth, S. Tschierlei and M. Schwalbe, Unexpected wavelength dependency of the photocatalytic CO<sub>2</sub> reduction performance of the well-known (bpy) Re(CO)<sub>3</sub>Cl complex, *Chem. Commun.*, 2019, **55**, 600–603.
- 45 C. Kotal, M. A. Weber, G. Ferraudi and D. Geiger, A Mechanistic Investigation of the Photoinduced Reduction of Carbon-Dioxide Mediated by Tricarbonylbromo(2,2'-Bipyridine)Rhenium(I), *Organometallics*, 1985, **4**, 2161–2166.
- 46 A. Cannizzo, A. M. Blanco-Rodríguez, A. El Nahhas, J. Sebera, S. Zalis, A. Vlcek and M. Chergui, Femtosecond fluorescence and intersystem crossing in rhenium(I) carbonyl-bipyridine complexes, *J. Am. Chem. Soc.*, 2008, **130**, 8967–8974.
- 47 A. Cannizzo, A. M. Blanco-Rodríguez, E. Nahhas, J. Šebera, L. D. S. Ultrarapide and E. P. Fédérale, Femtosecond fluorescence and Intersystem Crossing in Rhenium (I) Carbonyl- Bipyridine Complexes I. Steady State Uv-Vis Absorption Spectra And Calculated Transition Strengths, **3**, 1–18.

- 48 A. Vlcek, Ultrafast Excited-State Processes in Re(I) Carbonyl-Diimine Complexes: From Excitation to Photochemistry, *Photophysics of Organometallics*, 2010, vol. 29, pp. 73–114.
- 49 S. Sato, Y. Matubara, K. Koike, M. Falkenstrom, T. Katayama, Y. Ishibashi, H. Miyasaka, S. Taniguchi, H. Chosrowjan, N. Mataga, N. Fukazawa, S. Koshihara, K. Onda and O. Ishitani, Photochemistry of fac-[Re(bpy)(CO)<sub>3</sub>Cl], *Chemistry*, 2012, **18**, 15722–15734.
- 50 M. Isegawa, F. Neese and D. A. Pantazis, Ionization Energies and Aqueous Redox Potentials of Organic Molecules: Comparison of DFT, Correlated ab Initio Theory and Pair Natural Orbital Approaches, *J. Chem. Theory Comput.*, 2016, **12**, 2272–2284.
- 51 J. M. Smieja and C. P. Kubiak, Re(bipy-tBu)(CO)<sub>3</sub>Cl-improved catalytic activity for reduction of carbon dioxide: IR-spectroelectrochemical and mechanistic studies, *Inorg. Chem.*, 2010, **49**, 9283–9289.
- 52 V. N. Staroverov, G. E. Scuseria, J. M. Tao and J. P. Perdew, Comparative assessment of a new nonempirical density functional: Molecules and hydrogen-bonded complexes, *J. Chem. Phys.*, 2003, **119**, 12129–12137.
- 53 A. D. Becke, Density Functional Calculations of Molecular Bond Energies, *Phys. Rev. A: At., Mol., Opt. Phys.*, 1988, **38**, 3098.
- 54 A. D. Becke, Density-Functional Thermochemistry .3. The Role of Exact Exchange, *J. Chem. Phys.*, 1993, **98**, 5648–5652.
- 55 C. Lee, W. Yang and R. G. Parr, Development of the Colle-Salvetti Correlation-Energy Formula into a Functional of the Electron Density, *Phys. Rev. B: Condens. Matter Mater. Phys.*, 1988, **37**, 785.
- 56 S. Grimme, J. Antony, S. Ehrlich and H. Krieg, A Consistent and Accurate Ab Initio Parametrization of Density Functional Dispersion Correction (DFT-D) for the 94 Elements H-Pu, *J. Chem. Phys.*, 2010, **132**, 074104.
- 57 C. Riplinger, M. D. Sampson, A. M. Ritzmann, C. P. Kubiak and E. A. Carter, Mechanistic contrasts between manganese and rhenium bipyridine electrocatalysts for the reduction of carbon dioxide, *J. Am. Chem. Soc.*, 2014, **136**, 16285–16298.
- 58 M. Isegawa and A. K. Sharma, CO<sub>2</sub> reduction by a Mn electrocatalyst in the presence of a Lewis acid: a DFT study on the reaction mechanism, *Sustainable Energy Fuels*, 2019, **3**, 1730–1738.
- 59 J. A. Keith, K. A. Grice, C. P. Kubiak and E. A. Carter, Elucidation of the selectivity of proton-dependent electrocatalytic CO<sub>2</sub> reduction by fac-Re(bpy)(CO)<sub>3</sub>Cl, *J. Am. Chem. Soc.*, 2013, **135**, 15823–15829.
- 60 J. A. Barrett, C. J. Miller and C. P. Kubiak, Electrochemical Reduction of CO<sub>2</sub> Using Group VII Metal Catalysts, *Trends Chem.*, 2021, **3**, 176–187.
- 61 M. L. Clark, K. A. Grice, C. E. Moore, A. L. Rheingold and C. P. Kubiak, Electrocatalytic CO<sub>2</sub> reduction by M(bpy-R)(CO)<sub>4</sub> (M = Mo, W; R = H, tBu) complexes. Electrochemical, spectroscopic, and computational studies and comparison with group 7 catalysts, *Chem. Sci.*, 2014, **5**, 1894–1900.
- 62 M. Isegawa, A. K. Sharma, S. Ogo and K. Morokuma, Electron and Hydride Transfer in a Redox-Active NiFe Hydride Complex: A DFT Study, *ACS Catal.*, 2018, **8**, 10419–10429.
- 63 M. Isegawa, T. Matsumoto and S. Ogo, Selective Oxidation of H<sub>2</sub> and CO by NiIr Catalyst in Aqueous Solution: A DFT Mechanistic Study, *Inorg. Chem.*, 2020, **59**, 1014–1028.

Dear Author

Please use this PDF proof to check the layout of your article. If you would like any changes to be made to the layout, you can leave instructions in the online proofing interface. First, return to the online proofing interface by clicking "Edit" at the top page, then insert a Comment in the relevant location. Making your changes directly in the online proofing interface is the quickest, easiest way to correct and submit your proof.

Please note that changes made to the article in the online proofing interface will be added to the article before publication, but are not reflected in this PDF proof.
